# Supplementary material for: Prediction of molecular packing characteristics of two-component crystals
Source: Royal Society of Chemistry journal article supplement (doi:10.1039/d4ce00303a), 2024-01-01
Supplement: d4ce00303a1.pdf [file d4ce00303a1.pdf]

Supporting Information

for

# Prediction of Molecular Packing Characteristics of Two-Component Crystals

*German L. Perlovich\**, *Artem O. Surov*

G.A. Krestov Institute of Solution Chemistry of the Russian Academy of Sciences, 153045,  
Ivanovo, Russia. E-mail: [glp@isc-ras.ru](mailto:glp@isc-ras.ru)

\*To whom correspondence should be addressed: Telephone: +7-4932-533784; Fax: +7-4932-336237; E-mail [glp@isc-ras.ru](mailto:glp@isc-ras.ru)

**Table S1.** Estimated values of the free volumes,  $V_{free}^{HXR}$ , and the unit cell volumes,  $V_{cell}^{HXR}$ , for the some cocrystals of 4-hydroxy-benzoic acid described in literature without solving crystal structure<sup>a</sup>

| N | CF1     | CF2                                   | Stoich           | $V^{vdw}(CF1)$<br>[Å <sup>3</sup> ] | $V^{vdw}(CF2)$<br>[Å <sup>3</sup> ] | $C^{HXR}$ | $D^{HXR}$ | $\beta^{HXR}(CF2)$<br>[%] | $\beta^{HXR}(CC)$<br>[%] | $V_{free}^{HXR}$<br>[Å <sup>3</sup> ] | $V_{cell}^{HXR}$<br>[Å <sup>3</sup> ] | $T_{fus}(CC)$<br>[°C] |
|---|---------|---------------------------------------|------------------|-------------------------------------|-------------------------------------|-----------|-----------|---------------------------|--------------------------|---------------------------------------|---------------------------------------|-----------------------|
| 1 | 4-OH-BA | Meloxicam                             | 1:1 <sup>c</sup> | 118.81                              | 274.59                              | -12.27    | 0.682     | 35.5                      | 11.9                     | 46.84                                 | 440.24                                | 207.5                 |
| 2 | 4-OH-BA | Tenoxicam                             | 1:1 <sup>d</sup> | 118.81                              | 256.31                              | -12.27    | 0.682     | 36.5                      | 12.6                     | 47.35                                 | 422.47                                | 205.2                 |
| 3 | 4-OH-BA | Nitrofurantoin                        | 1:1 <sup>e</sup> | 118.81                              | 177.58                              | -12.27    | 0.682     | 35.6                      | 12.0                     | 35.59                                 | 331.98                                | 243.6                 |
| 4 | 4-OH-BA | 4-N(Me) <sub>2</sub> -Py <sup>b</sup> | 1:1 <sup>f</sup> | 118.81                              | 124.20                              | -12.27    | 0.682     | 38.3                      | 13.9                     | 33.66                                 | 276.67                                | 190.0                 |
| 5 | 4-OH-BA | Progesterone                          | 1:1 <sup>g</sup> | 118.81                              | 318.94                              | -12.27    | 0.682     | 44.8                      | 18.3                     | 80.04                                 | 517.79                                | 141.3                 |
| 6 | 4-OH-BA | Lesinurad                             | 1:1 <sup>h</sup> | 118.81                              | 292.03                              | -12.27    | 0.682     | 45.0                      | 18.4                     | 75.70                                 | 486.55                                | 159.9                 |

<sup>a</sup>  $V^{vdw}(CF1)$ ,  $V^{vdw}(CF2)$  are van der Waals volumes of cofomers 1 and 2, correspondingly;  $C^{HXR}$  and  $D^{HXR}$  are correlation coefficients of equation (4) for the high temperature X-Ray experiments;

<sup>b</sup> 4-N(Me)<sub>2</sub>-Py is dimethylamino pyridine;

<sup>c</sup> Cheney et al. CGD, 2010, 4401. 10.1021/cg100514g

<sup>d</sup> Patel et al. IJP, 2012, 685. 10.1016/j.ijpharm.2012.07.034;

<sup>e</sup> Vangala et al. CrystEngComm, 2011, 759. 10.1039/c0ce00772b;

<sup>f</sup> Lou et al. J Mol Struc., 2015, 516. 10.1016/j.molstruc.2015.07.008;

<sup>g</sup> Samipillai et al, J. Crystal Growth, 2019, 270. 10.1016/j.jcrysgro.2018.10.050;

<sup>h</sup> S.V. Narasayya et al. / Materials Today: Proceedings 14 (2019) 532–544.

**Table S2.** Estimated values of the free volumes,  $V_{free}^{LXR}$ , and the unit cell volumes,  $V_{cell}^{LXR}$ , for the some cocrystals of Carbamazepine described in literature without solving crystal structure<sup>a</sup>

| N | CF1 | CF2             | Stoich           | $V^{vdw}(CF1)$<br>[Å <sup>3</sup> ] | $V^{vdw}(CF2)$<br>[Å <sup>3</sup> ] | $C^{LXR}$ | $D^{LXR}$ | $\beta^{LXR}(CF2)$<br>[%] | $\beta^{LXR}(CC)$<br>[%] | $V_{free}^{LXR}$<br>[Å <sup>3</sup> ] | $V_{cell}^{LXR}$<br>[Å <sup>3</sup> ] | $T_{fus}(CC)$<br>[°C] |
|---|-----|-----------------|------------------|-------------------------------------|-------------------------------------|-----------|-----------|---------------------------|--------------------------|---------------------------------------|---------------------------------------|-----------------------|
| 1 | CBZ | Oxalic Acid     | 1:1 <sup>b</sup> | 206.43                              | 66.71                               | 25.05     | 0.438     | 15.05                     | 31.64                    | 86.43                                 | 359.57                                | 157.7                 |
| 2 | CBZ | Glycolic Acid   | 1:1 <sup>b</sup> | 206.43                              | 64.18                               | 25.05     | 0.438     | 30.70                     | 38.50                    | 104.18                                | 374.79                                | 139.3                 |
| 3 | CBZ | L-Tartaric Acid | 1:1 <sup>b</sup> | 206.43                              | 117.26                              | 25.05     | 0.438     | 18.40                     | 33.11                    | 107.17                                | 430.86                                | 91.1                  |
| 4 | CBZ | Trimesic acid   | 1:1 <sup>c</sup> | 206.43                              | 165.00                              | 25.05     | 0.438     | 15.32                     | 31.76                    | 117.97                                | 489.40                                | 278.0                 |
| 5 | CBZ | Urea            | 1:1 <sup>d</sup> | 206.43                              | 53.45                               | 25.05     | 0.438     | 36.39                     | 40.99                    | 106.52                                | 366.40                                | 169.0                 |

<sup>a</sup>  $V^{vdw}(CF1)$ ,  $V^{vdw}(CF2)$  are van der Waals volumes of coformers 1 and 2, correspondingly;  $C^{LXR}$  and  $D^{LXR}$  are correlation coefficients of equation

(4) for the low temperature X-Ray experiments;

<sup>b</sup> Childs et al. CrystEngComm, 2008, 856. 10.1039/b715396a;

<sup>c</sup> Fleischman et al. CGD, 2003, 919. 10.1021/cg034035x;

<sup>d</sup> Lu et al. CrystEngComm, 2008, 665. 10.1039/b801713c;

**Table S3.** Estimated values of the free volumes,  $V_{free}^{HXR}$ , and the unit cell volumes,  $V_{cell}^{HXR}$ , for the some cocrystals of Carbamazepine described in literature without solving crystal structure<sup>a</sup>

| N | CF1 | CF2             | Stoich           | $V^{vdw}(CF1)$<br>[Å <sup>3</sup> ] | $V^{vdw}(CF2)$<br>[Å <sup>3</sup> ] | $C^{HXR}$ | $D^{HXR}$ | $\beta^{HXR}(CF2)$<br>[%] | $\beta^{HXR}(CC)$<br>[%] | $V_{free}^{HXR}$<br>[Å <sup>3</sup> ] | $V_{cell}^{HXR}$<br>[Å <sup>3</sup> ] | $T_{fus}(CC)$<br>[°C] |
|---|-----|-----------------|------------------|-------------------------------------|-------------------------------------|-----------|-----------|---------------------------|--------------------------|---------------------------------------|---------------------------------------|-----------------------|
| 1 | CBZ | Oxalic Acid     | 1:1 <sup>b</sup> | 206.43                              | 66.71                               | 27.24     | 0.406     | 16.32                     | 33.87                    | 92.50                                 | 365.64                                | 157.7                 |
| 2 | CBZ | Glycolic Acid   | 1:1 <sup>b</sup> | 206.43                              | 64.18                               | 27.24     | 0.406     | 30.70                     | 39.70                    | 107.44                                | 378.05                                | 139.3                 |
| 3 | CBZ | L-Tartaric Acid | 1:1 <sup>b</sup> | 206.43                              | 117.26                              | 27.24     | 0.406     | 20.90                     | 35.73                    | 115.64                                | 439.33                                | 91.1                  |
| 4 | CBZ | Trimesic acid   | 1:1 <sup>c</sup> | 206.43                              | 165.00                              | 27.24     | 0.406     | 20.80                     | 35.68                    | 132.54                                | 503.97                                | 278.0                 |
| 5 | CBZ | Urea            | 1:1 <sup>d</sup> | 206.43                              | 53.45                               | 27.24     | 0.406     | 38.25                     | 42.77                    | 111.15                                | 371.03                                | 169.0                 |

<sup>a</sup>  $V^{vdw}(CF1)$ ,  $V^{vdw}(CF2)$  are van der Waals volumes of cofomers 1 and 2, correspondingly;  $C^{HXR}$  and  $D^{HXR}$  are correlation coefficients of equation

(4) for the high temperature X-Ray experiments;

<sup>b</sup> Childs et al. CrystEngComm, 2008, 856. 10.1039/b715396a;

<sup>c</sup> Fleischman et al. CGD, 2003, 919. 10.1021/cg034035x;

<sup>d</sup> Lu et al. CrystEngComm, 2008, 665. 10.1039/b801713c;

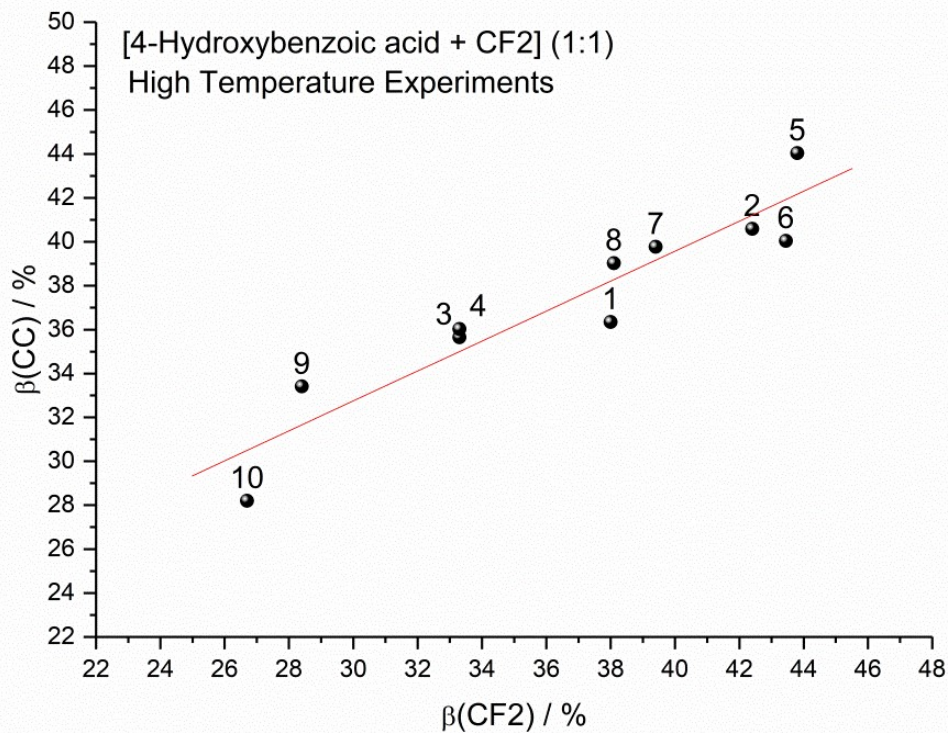

Figure S1. Correlation between the  $\beta(CC)$  and  $\beta(CF_2)$  parameters for the cluster of the [4-hydroxybenzoic acid+CF2] (1:1) two-component crystals obtained from high temperature X-Ray experiments. The numbers correspond to the following coformers (CF2): 1- nicotinamide, 2- voriconazole, 3- pyrazinamide (cocrystal form I), 4- pyrazinamide (cocrystal form II), 5- nefiracetam, 6- abiraterone acetate, 7- fluconazole, 8- paliperidone, 9- acefylline, 10- malonic acid

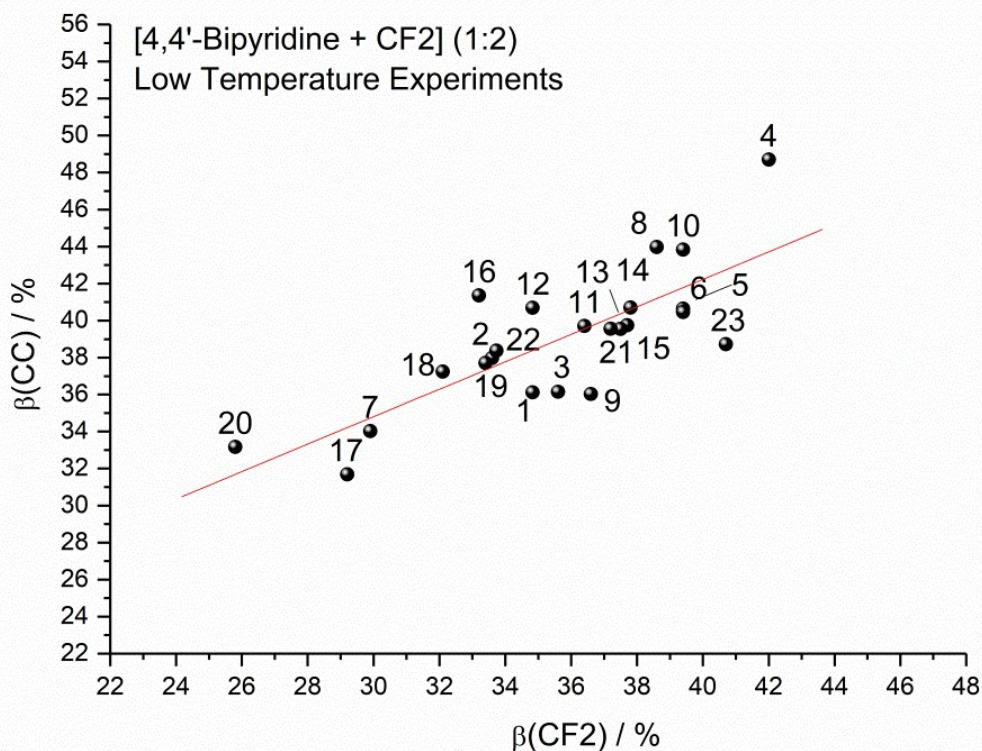

Figure S2. Correlation between the  $\beta(CC)$  and  $\beta(CF_2)$  parameters for the cluster of the [4,4'-bipyridine+CF2] (1:2) two-component crystals obtained from low temperature X-Ray experiments. The numbers correspond to the following cofomers (CF2): 1- flufenamic acid (cocrystal form I), 2- tolfenamic acid, 3- mefenamic acid, 4- carbamazepine, 5- (RS)-ibuprofen (cocrystal form I), 6- (S)-ibuprofen, 7- salicylic acid, 8- thiophanate-methyl, 9- flurbiprofen, 10- (RS)-ibuprofen (cocrystal form II), 11- felodipine, 12- flufenamic acid (cocrystal form II), 13- (S)-naproxen, 14- (RS)-naproxen, 15- N-oxaprozin, 16- acetylsalicylic acid, 17- emodin, 18- furosemide, 19- nimesulide, 20- 4-hydroxybenzoic acid, 21- 3,5-dibromophenol, 22- p-toluic acid, 23- (RS)-2-phenylbutyric acid

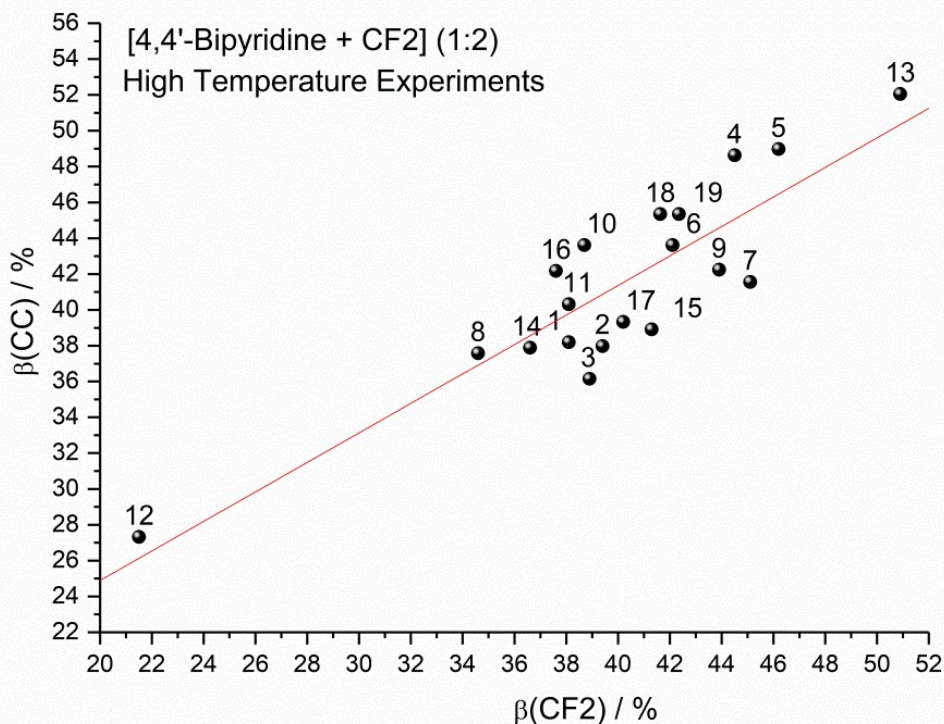

Figure S3. Correlation between the  $\beta(CC)$  and  $\beta(CF_2)$  parameters for the cluster of the [4,4'-bipyridine+CF2] (1:2) two-component crystals obtained from high temperature X-Ray experiments. The numbers correspond to the following coformers (CF2): 1- N-phenylanthranilic acid (cocrystal form I), 2- tolfenamic acid, 3- mefenamic acid, 4- haloprogin, 5- iodopropynyl butylcarbamate, 6- carprofen, 7- ibuprofen, 8- salicylic acid, 9- meclofenamic acid, 10- acetylsalicylic acid, 11- N-phenylanthranilic acid (cocrystal form II), 12- quinolinic acid, 13- 2,6-diisopropylphenol, 14- diflunisal, 15- N-bromophthalimide, 16- 3-chloro-2-nitrobenzoic acid, 17- zaltoprofen, 18- azilsartan, 19- diclofenac

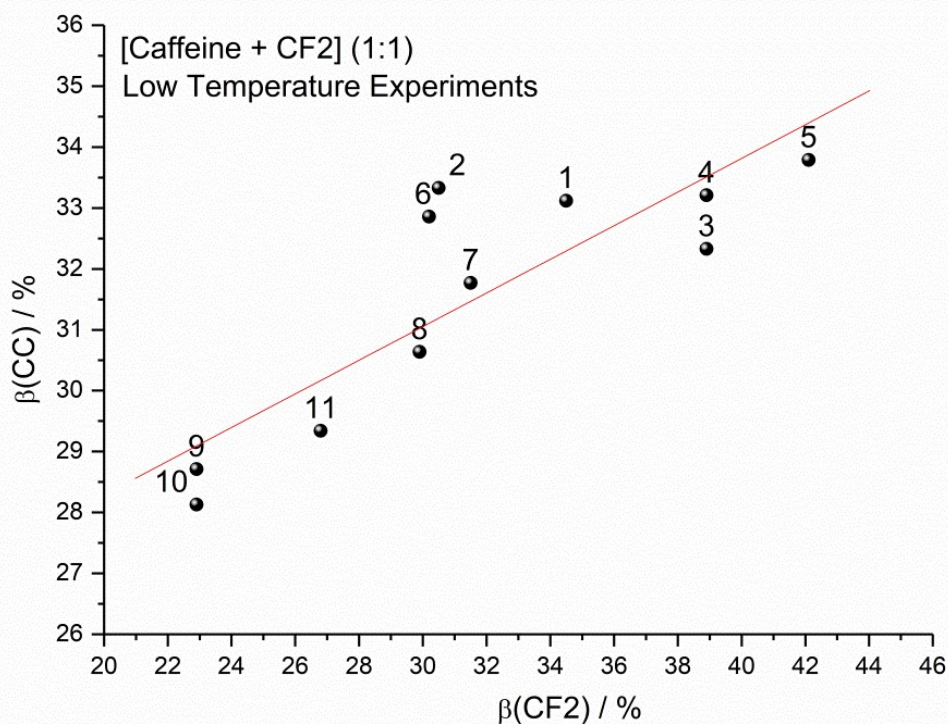

Figure S4. Correlation between the  $\beta(CC)$  and  $\beta(CF_2)$  parameters for the cluster of the [Caffeine+CF2] (1:1) two-component crystals obtained from low temperature X-Ray experiments. The numbers correspond to the following coformers (CF2): 1- furosemide, 2- niclosamide, 3- pterostilbene (cocrystal form I), 4- pterostilbene (cocrystal form II), 5- zonisamide, 6- maleic acid, 7- glutaric acid, 8- salicylic acid, 9- citric acid (cocrystal form I), 10- citric acid (cocrystal form II), 11- isophthalic acid



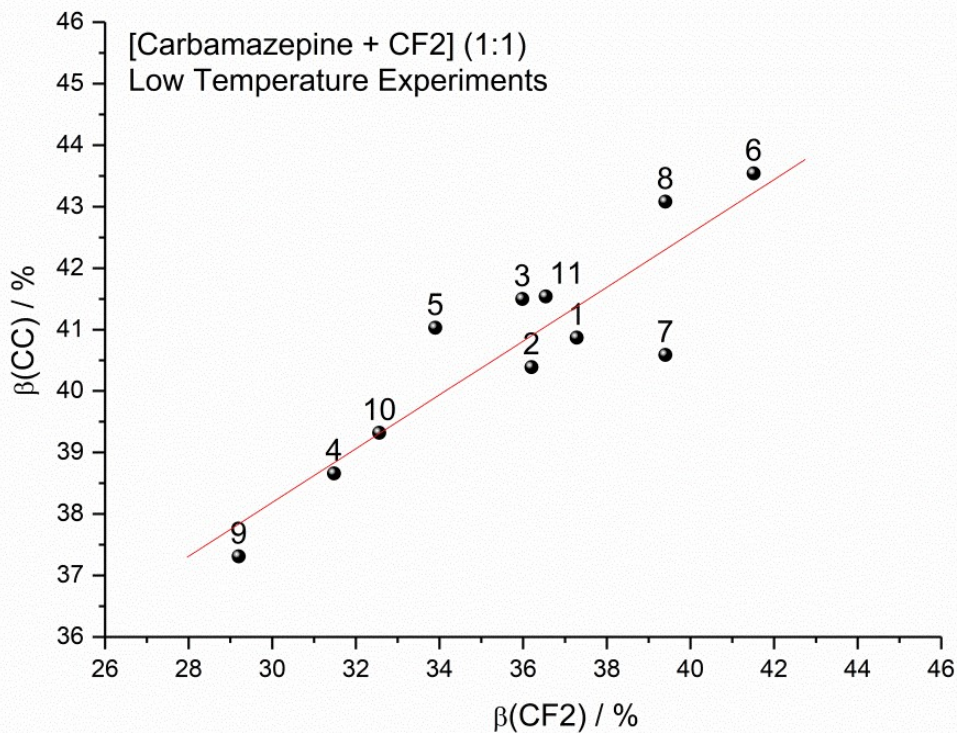

Figure S5. Correlation between the  $\beta(CC)$  and  $\beta(CF_2)$  parameters for the cluster of the [Carbamazepine+CF2] (1:1) two-component crystals obtained from low temperature X-Ray experiments. The numbers correspond to the following cofomers (CF2): 1- benzoic acid, 2- 1-hydroxy-2-naphthoic acid, 3- nicotinamide, 4- glutaric acid, 5- salicylic acid, 6- 4-hydroxybenzamide, 7- saccharin (cocrystal form I), 8- saccharin (cocrystal form II), 9- emodin, 10- benzamide, 11- isonicotinamide

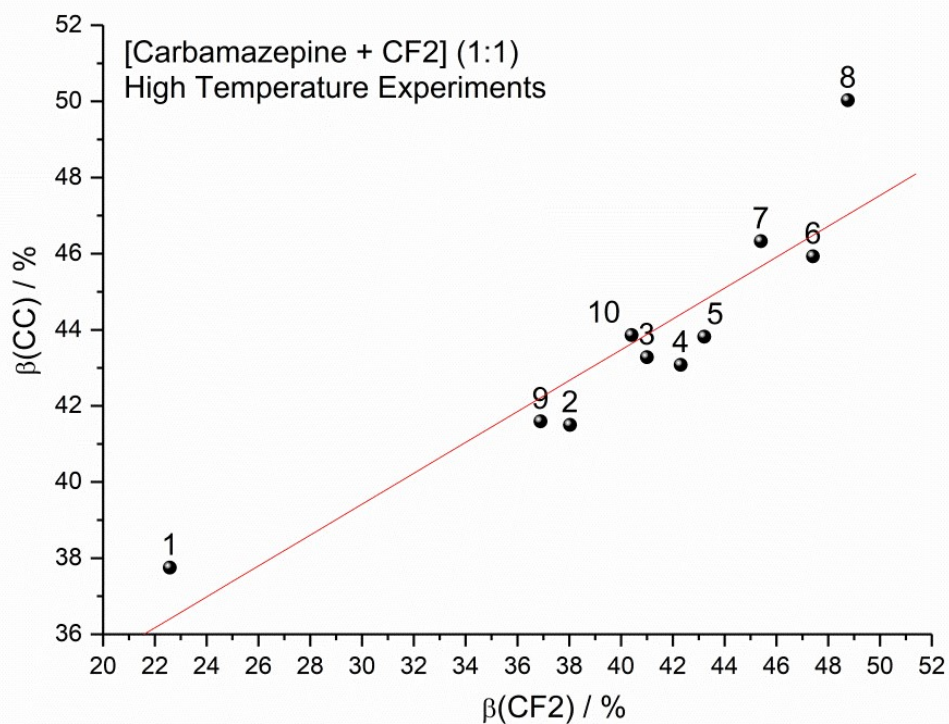

Figure S6. Correlation between the  $\beta(CC)$  and  $\beta(CF_2)$  parameters for the cluster of the [Carbamazepine+CF2] (1:1) two-component crystals obtained from high temperature X-Ray experiments. The numbers correspond to the following coformers (CF2): 1- DL-tartaric Acid, 2- nicotinamide, 3- cinnamic acid, 4- saccharin, 5- indomethacin, 6- 7-hydroxyflavanone, 7- naringenin, 8- paeonol, 9- 2,6-dihydroxybenzoic acid, 10- isonicotinamide

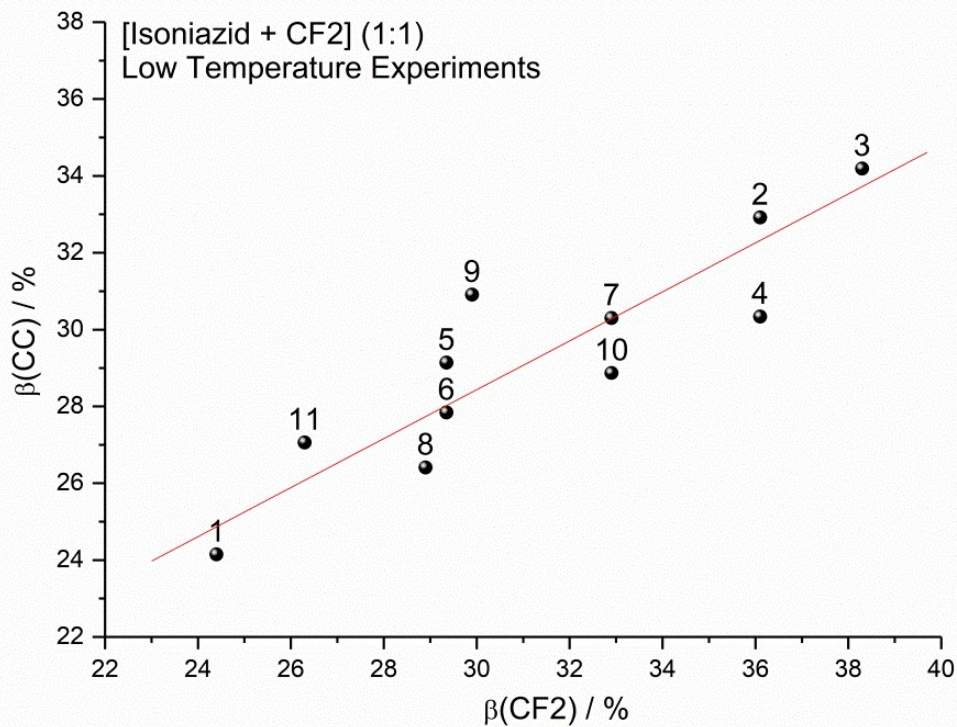

Figure S7. Correlation between the  $\beta(CC)$  and  $\beta(CF_2)$  parameters for the cluster of the [Isoniazid+CF2] (1:1) two-component crystals obtained from low temperature X-Ray experiments. The numbers correspond to the following coformers (CF2): 1- gallic acid, 2- cinnamic acid (cocrystal form I), 3- benzoic acid, 4- cinnamic acid (cocrystal form II), 5- caffeic acid (cocrystal form I), 6- caffeic acid (cocrystal form II), 7- pimelic acid, 8- 2,4-dihydroxybenzoic acid, 9- salicylic acid, 10- 4-hydroxycinnamic acid, 11- 2,5-dihydroxybenzoic acid

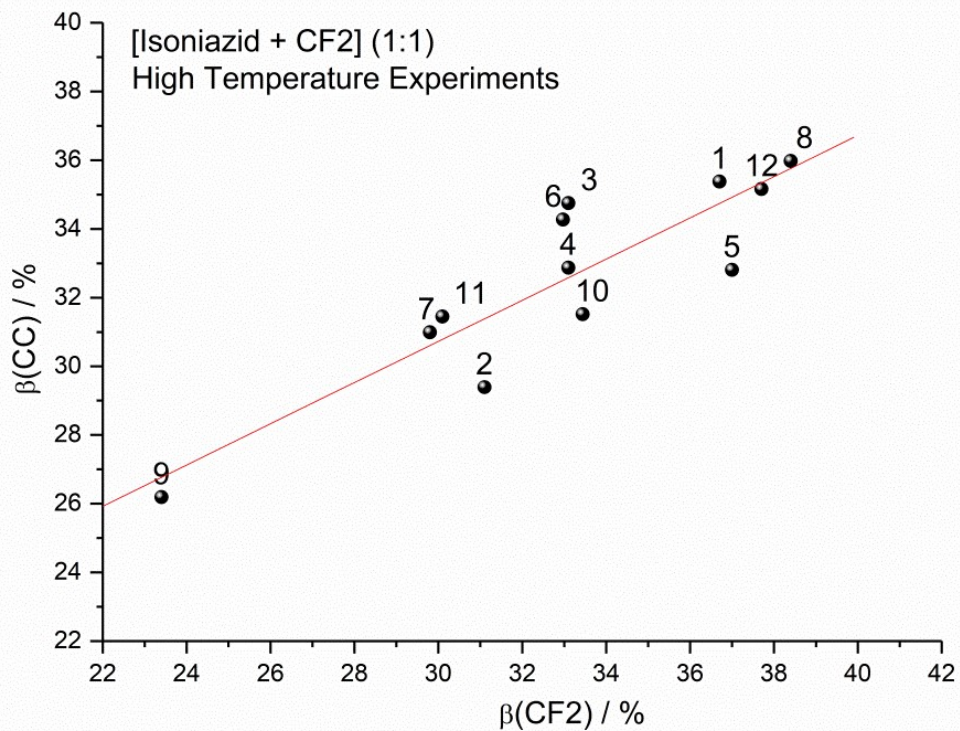

Figure S8. Correlation between the  $\beta(CC)$  and  $\beta(CF_2)$  parameters for the cluster of the [Isoniazid+CF2] (1:1) two-component crystals obtained from high temperature X-Ray experiments. The numbers correspond to the following cofomers (CF2): 1- 2,3-dihydroxybenzoic acid, 2- 3,5-dihydroxybenzoic acid, 3- vanillic acid (cocrystal form I), 4- vanillic acid (cocrystal form II), 5- ferulic acid, 6- resorcinol, 7- 4-nitrobenzoic acid, 8- 4-cyanobenzoic acid, 9- gallic acid, 10- picric acid, 11- resveratrol, 12- 4-aminosalicylic acid

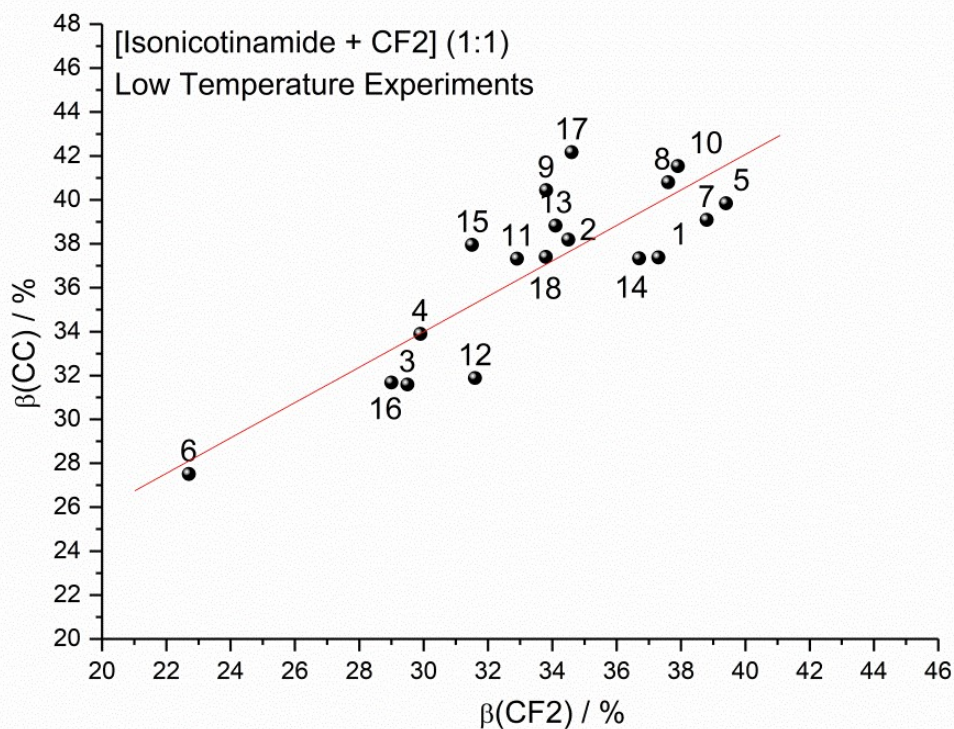

Figure S9. Correlation between the  $\beta(CC)$  and  $\beta(CF_2)$  parameters for the cluster of the [Isonicotinamide+CF2] (1:1) two-component crystals obtained from low temperature X-Ray experiments. The numbers correspond to the following cofomers (CF2): 1- benzoic acid, 2- furosemide, 3- pyrazinoic acid, 4- salicylic acid, 5- (RS)-Ibuprofen, 6- quercetin, 7- etodolac, 8- progesterone, 9- vanillin, 10- carbamazepine, 11- pimelic acid, 12- suberic acid, 13- azelaic acid, 14- adipic acid, 15- glutaric acid, 16- 3,5-dinitrobenzoic acid, 17- succinamic acid, 18- (S)-mandelic acid

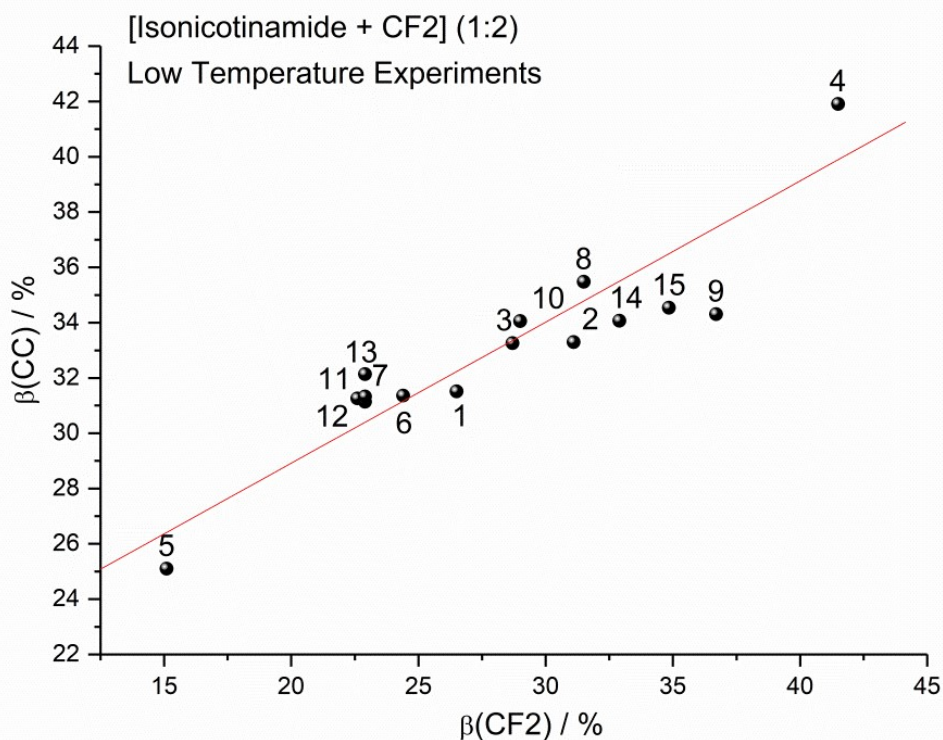

Figure S10. Correlation between the  $\beta(CC)$  and  $\beta(CF_2)$  parameters for the cluster of the [Isonicotinamide+CF2] (1:2) two-component crystals obtained from low temperature X-Ray experiments. The numbers correspond to the following coformers (CF2): 1- L-tartaric acid, 2- genistein, 3- dihydrocaffeic acid, 4- naringenin, 5- oxalic acid, 6- malonic acid, 7- succinic acid, 8- glutaric acid, 9- adipic acid, 10- 3,5-dinitrobenzoic acid, 11- citric acid (cocrystal form I), 12- citric acid (cocrystal form II), 13- citric acid (cocrystal form III), 14- pimelic acid, 15- sebacic acid

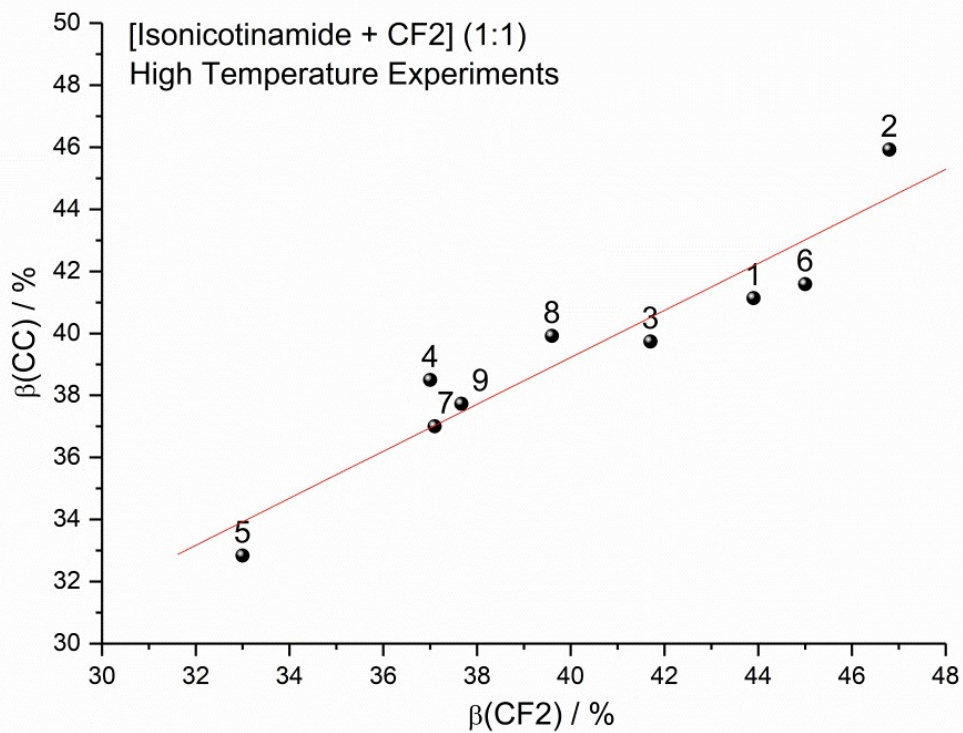

Figure S11. Correlation between the  $\beta(CC)$  and  $\beta(CF2)$  parameters for the cluster of the [Isonicotinamide+CF2] (1:1) two-component crystals obtained from high temperature X-Ray experiments. The numbers correspond to the following cofomers (CF2): 1- meclofenamic acid, 2- Agomelatine, 3- (S)-naproxen, 4- ferulic acid, 5- theophylline, 6- febuxostat, 7- entacapone, 8- zileuton, 9- glutaric acid

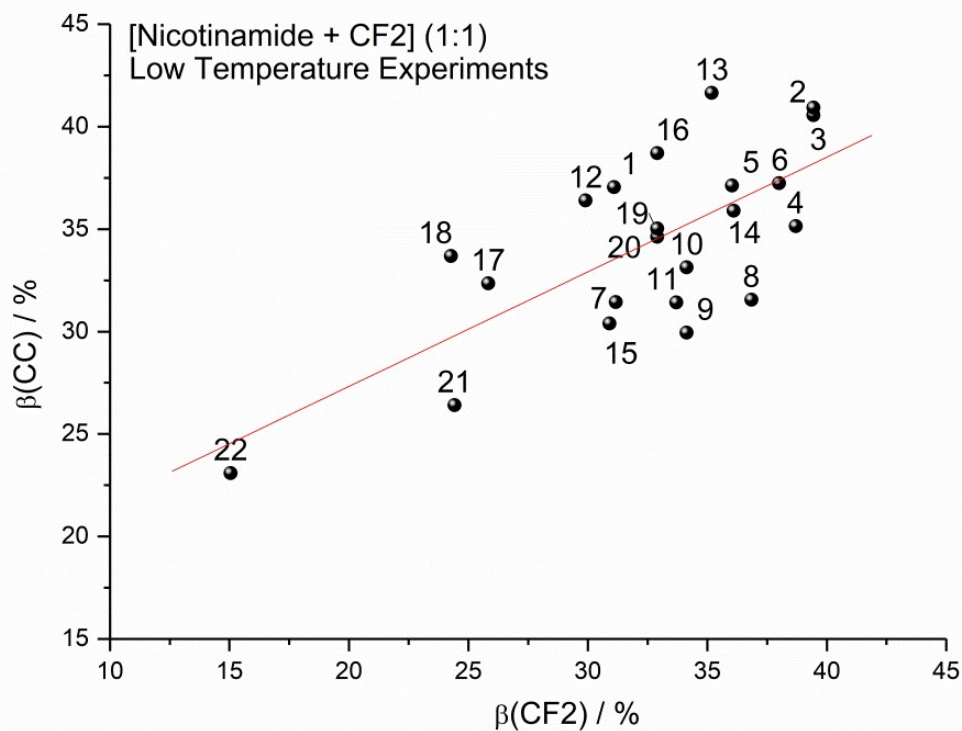

Figure S12. Correlation between the  $\beta(CC)$  and  $\beta(CF_2)$  parameters for the cluster of the [Nicotinamide+CF<sub>2</sub>] (1:1) two-component crystals obtained from low temperature X-Ray experiments. The numbers correspond to the following coformers (CF<sub>2</sub>): 1- acetazolamide, 2- (RS)-ibuprofen, 3- (S)-ibuprofen, 4- flurbiprofen, 5- flufenamic acid, 6- carbamazepine, 7- baicalein, 8- ethylparaben, 9- 4-coumaric acid (cocrystal form I), 10- 4-coumaric acid (cocrystal form II), 11- hydrochlorothiazide, 12- salicylic acid, 13- diethylstilbestrol, 14- trans-cinnamic acid, 15- vanillin, 16- pimelic acid, 17- 4-hydroxybenzoic acid, 18- fumaric acid, 19- (R)-mandelic acid (cocrystal form I), 20- (R)-mandelic acid (cocrystal form II), 21- malonic acid, 22- oxalic acid



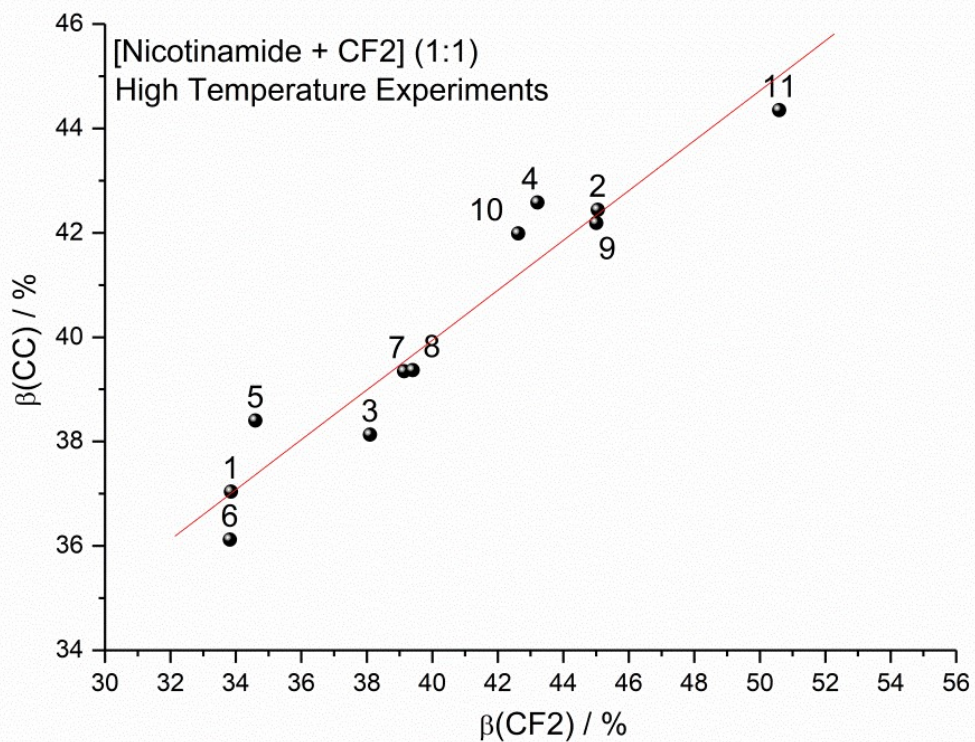

Figure S13. Correlation between the  $\beta(CC)$  and  $\beta(CF_2)$  parameters for the cluster of the [Nicotinamide+CF2] (1:1) two-component crystals obtained from high temperature X-Ray experiments. The numbers correspond to the following coformers (CF2): 1- furosemide (cocrystal form I), 2- febuxostat, 3- furosemide (cocrystal form II), 4- indomethacin, 5- salicylic acid, 6- sinapic acid, 7- acetaminophen, 8- metaxalone, 9- lesinurad, 10- zaltoprofen, 11- lorazepam

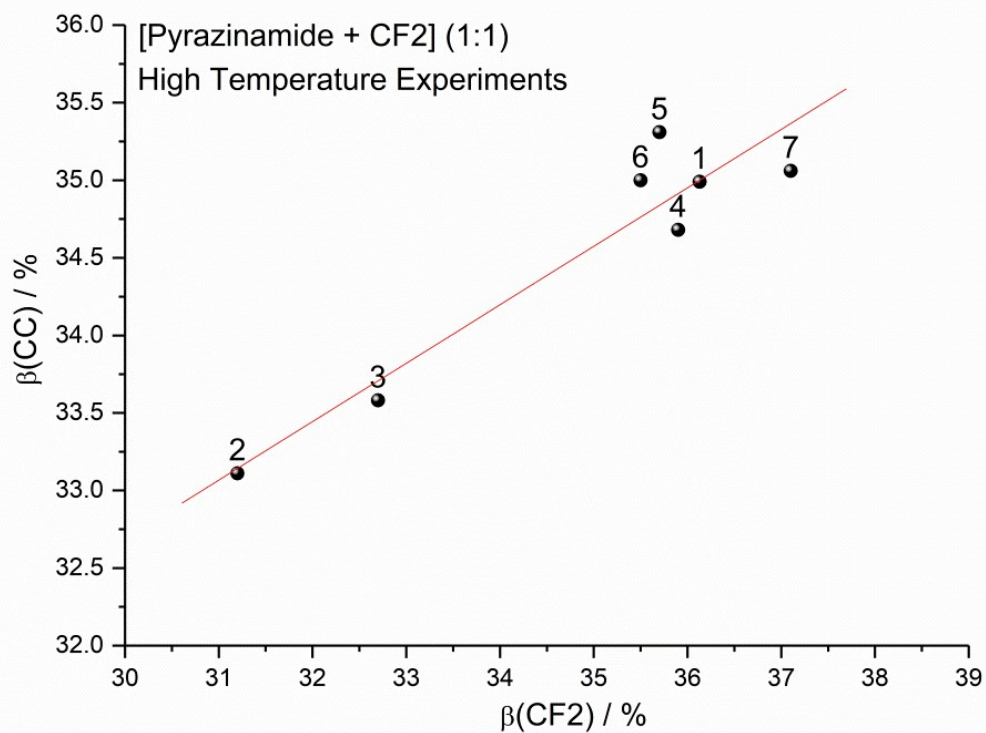

Figure S14. Correlation between the  $\beta(CC)$  and  $\beta(CF_2)$  parameters for the cluster of the [Pyrazinamide+CF2] (1:1) two-component crystals obtained from high temperature X-Ray experiments. The numbers correspond to the following cofomers (CF2): 1- p-aminobenzoic acid, 2- malonic acid, 3- 3,4-dihydroxybenzoic acid, 4- methylmalonic acid, 5- hydrochlorothiazide, 6- theophylline, 7- entacapone

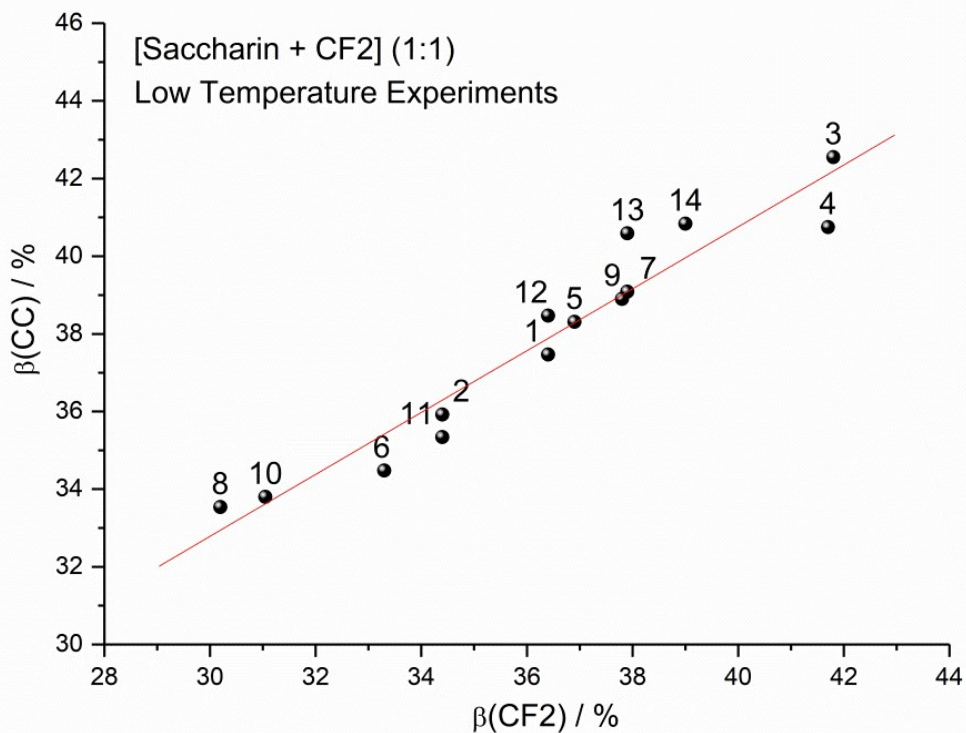

Figure S15. Correlation between the  $\beta(CC)$  and  $\beta(CF_2)$  parameters for the cluster of the [Saccharin+CF2] (1:1) two-component crystals obtained from low temperature X-Ray experiments. The numbers correspond to the following coformers (CF2): 1- dihydrocarbamazepine, 2- cyheptamide, 3- quinine, 4- sertraline, 5- venlafaxine, 6- piroxicam, 7- carbamazepine (cocrystal form I), 8- theophylline, 9- indomethacin, 10- vanillin isoniazid, 11- 2-ethoxybenzamide, 12- apatinib, 13- carbamazepine (cocrystal form II), 14- abiraterone acetate (cocrystal form II)

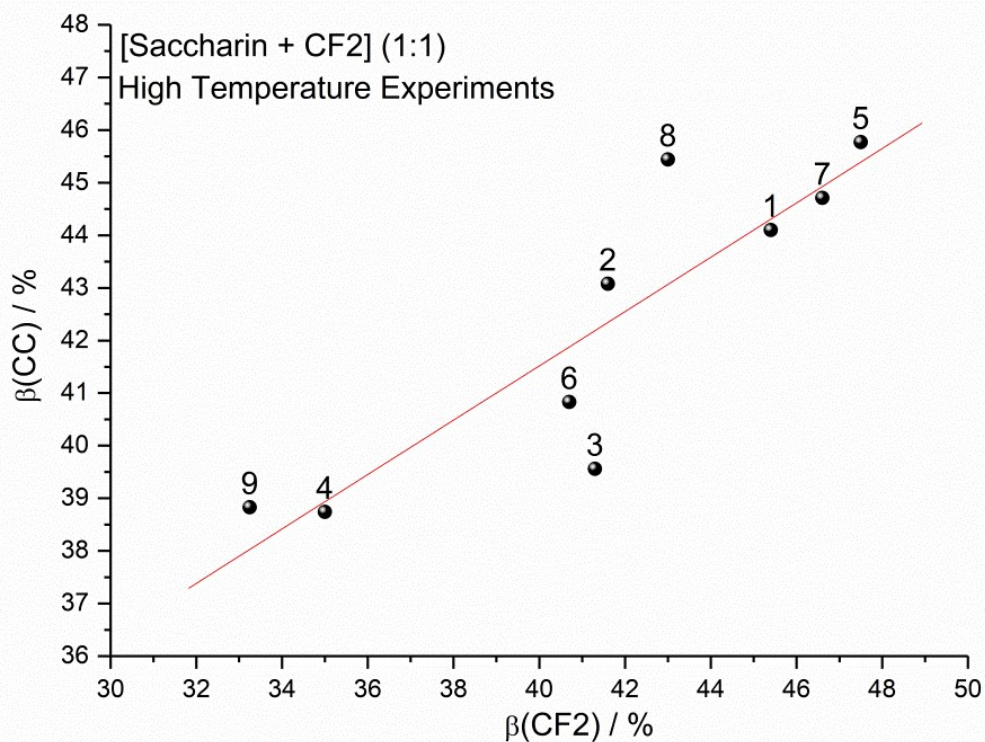

Figure S16. Correlation between the  $\beta(CC)$  and  $\beta(CF_2)$  parameters for the cluster of the [Saccharin+CF2] (1:1) two-component crystals obtained from high temperature X-Ray experiments. The numbers correspond to the following coformers (CF2): 1- sertraline, 2- carbamazepine, 3- megestrol acetate, 4- ciprofloxacin, 5- clofazimine, 6- antipyrine, 7- aminophenazone, 8- spironolactone, 9- emtricitabine

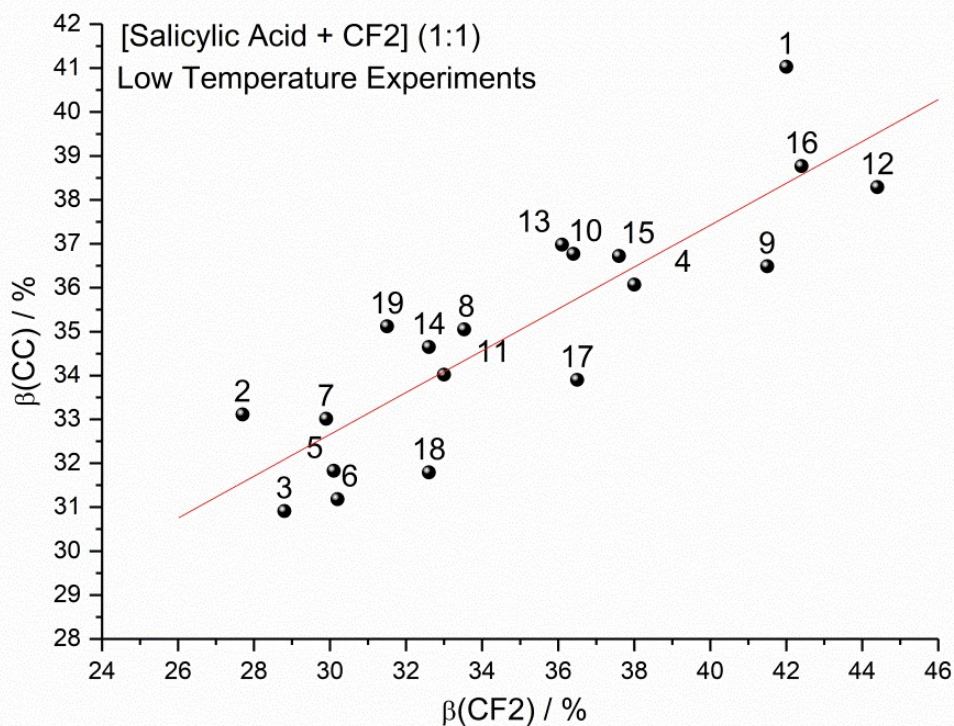

Figure S17. Correlation between the  $\beta(CC)$  and  $\beta(CF_2)$  parameters for the cluster of the [Salicylic acid+CF<sub>2</sub>] (1:1) two-component crystals obtained from low temperature X-Ray experiments. The numbers correspond to the following coformers (CF<sub>2</sub>): 1- carbamazepine, 2- nicotinic acid, 3- isoniazid, 4- N<sup>1</sup>-(propan-2-ylidene)isonicotinohydrazide, 5- caffeine, 6- theophylline, 7- gabapentin, 8- 4-dimethylaminopyridine, 9- 4-hydroxybenzamide, 10- apatinib, 11- theobromine, 12- 11-Azaartemisinin, 13- benznidazole, 14- tinidazole, 15- progesterone, 16- nicotinamide, 17- isonicotinamide, 18- benzamide, 19- 3-nitrobenzamide

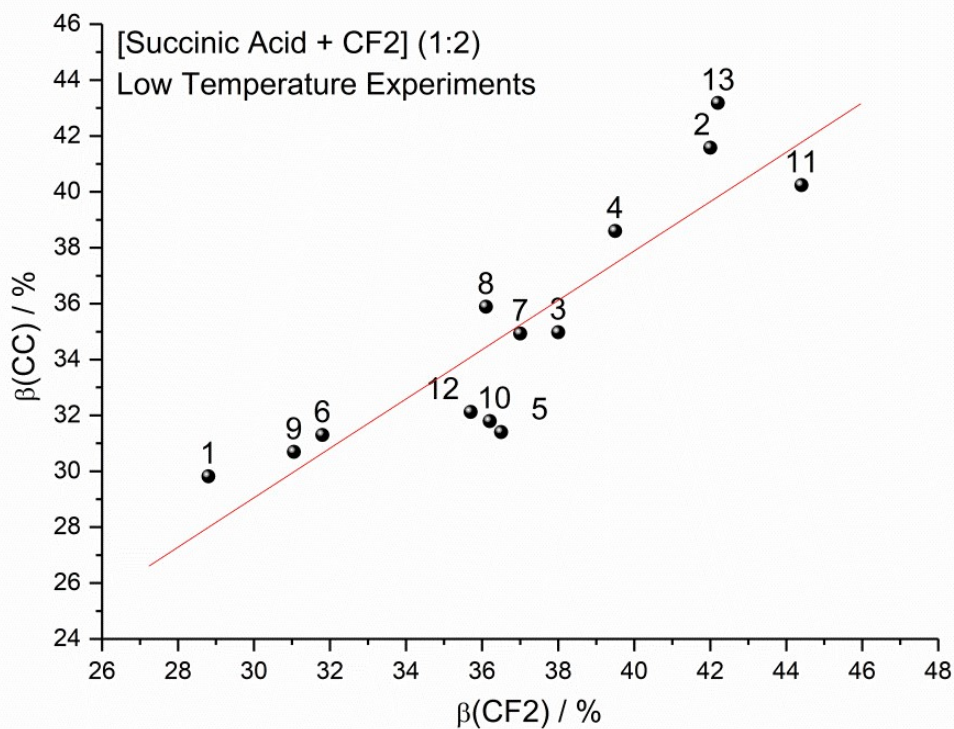

Figure S18. Correlation between the  $\beta(CC)$  and  $\beta(CF_2)$  parameters for the cluster of the [Succinic acid+CF2] (1:2) two-component crystals obtained from low temperature X-Ray experiments. The numbers correspond to the following coformers (CF2): 1- isoniazid, 2- carbamazepine, 3- N'-(propan-2-ylidene)isonicotinohydrazide, 4- itraconazole, 5- isonicotinamide, 6- meloxicam, 7- 4-bromobenzamide, 8- piroxicam, 9- 4-aminobenzamide, 10- 4-hydroxybenzamide, 11- 11-Azaartemisinin, 12- piperine, 13- baricitinib

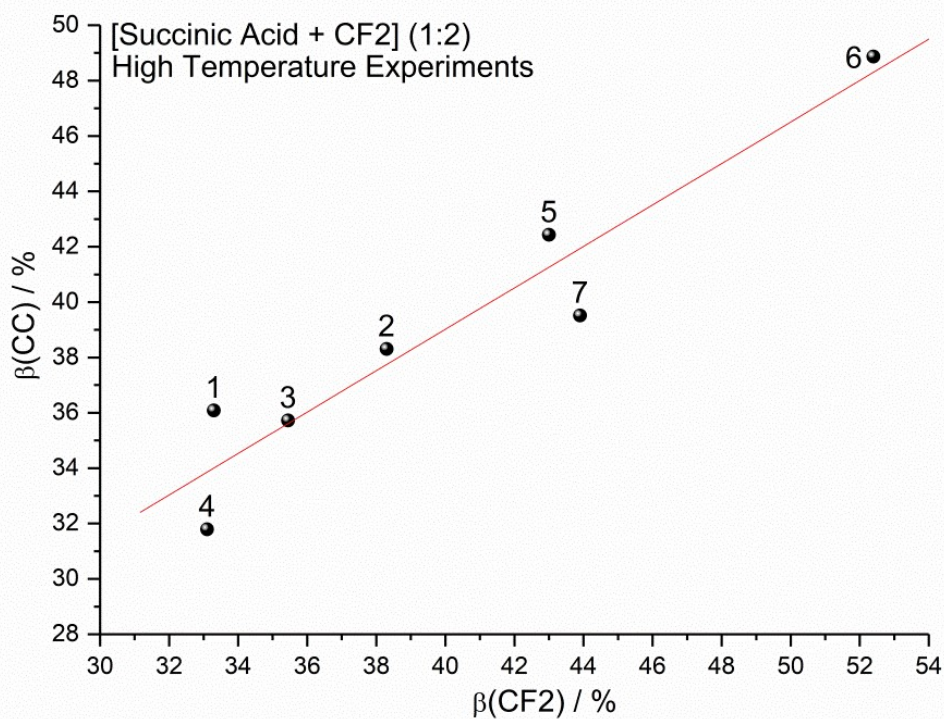

Figure S19. Correlation between the  $\beta(CC)$  and  $\beta(CF_2)$  parameters for the cluster of the [Succinic acid+CF<sub>2</sub>] (1:2) two-component crystals obtained from high temperature X-Ray experiments. The numbers correspond to the following cofomers (CF<sub>2</sub>): 1- pyrazinamide, 2- urea, 3- meloxicam, 4- isoniazid, 5- itraconazole, 6- adefovir dipivoxil, 7- 9-ethyladenine

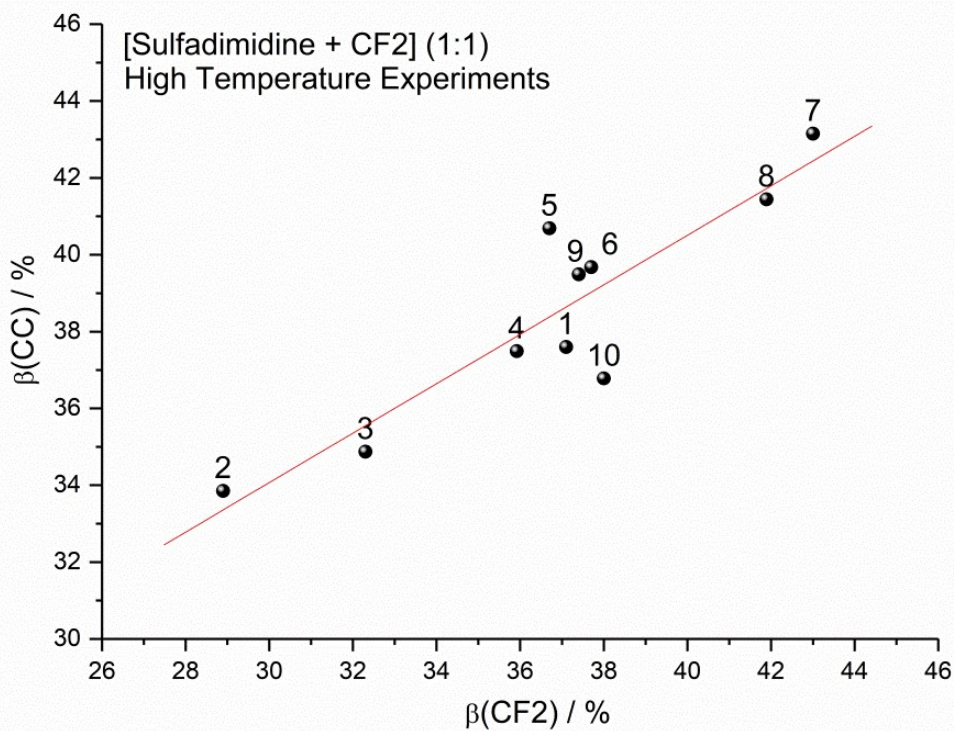

Figure S20. Correlation between the  $\beta(CC)$  and  $\beta(CF_2)$  parameters for the cluster of the [Sulfadimidine+CF2] (1:1) two-component crystals obtained from high temperature X-Ray experiments. The numbers correspond to the following cofomers (CF2): 1- 2-aminobenzoic acid, 2- 4-hydroxybenzoic acid, 3- 2,4-dihydroxybenzoic acid, 4- benzamide, 5- picolinamide, 6- 4-aminosalicylic acid, 7- flufenamic acid (form I), 8- niflumic acid, 9- 4-aminobenzoic acid, 10- nicotinamide



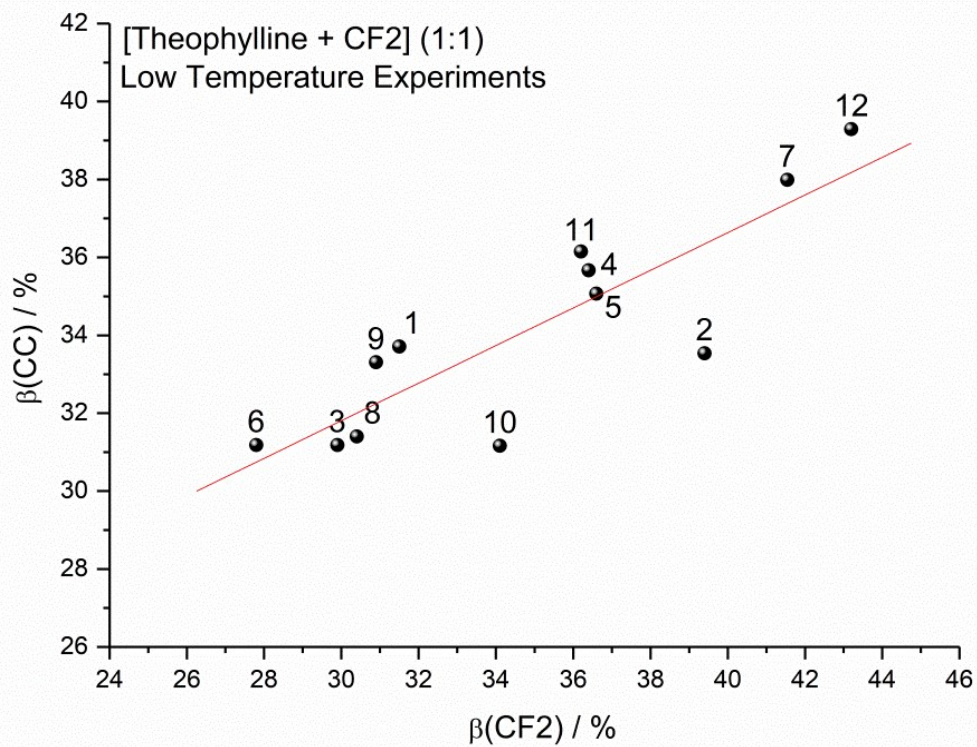

Figure S21. Correlation between the  $\beta(\text{CC})$  and  $\beta(\text{CF}_2)$  parameters for the cluster of the [Theophylline+CF<sub>2</sub>] (1:1) two-component crystals obtained from low temperature X-Ray experiments. The numbers correspond to the following cofomers (CF<sub>2</sub>): 1- glutaric acid, 2- saccharin, 3- salicylic acid, 4- urea, 5- benzamide, 6- pyrazinamide, 7- benzoic acid, 8- 4-aminobenzoic acid, 9- paracetamol, 10- p-coumaric acid, 11- diclofenac, 12- pyrimethamine

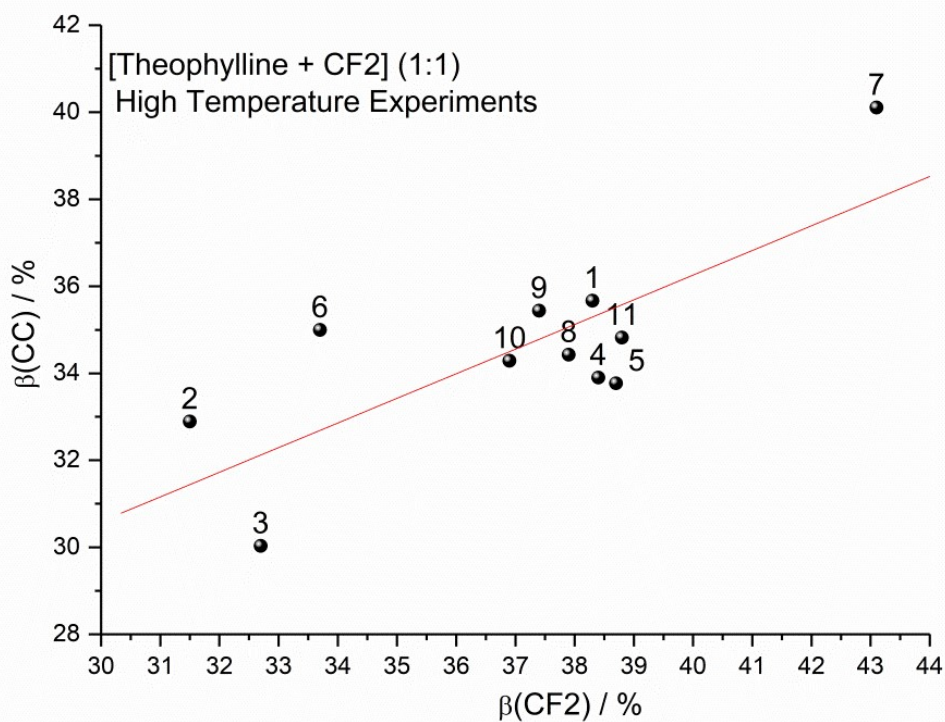

Figure S22. Correlation between the  $\beta(CC)$  and  $\beta(CF_2)$  parameters for the cluster of the [Theophylline+CF2] (1:1) two-component crystals obtained from high temperature X-Ray experiments. The numbers correspond to the following cofomers (CF2): 1- urea, 2- 3,5-dihydroxybenzoic acid, 3- 3,4-dihydroxybenzoic acid, 4- cinnamic acid, 5- benzamide, 6- pyrazinamide, 7- benzoic acid, 8- acetylsalicylic acid, 9- 4-aminobenzoic acid, 10- 3-aminobenzoic acid, 11- paracetamol
